# Supplementary material for: Molecular Dynamics-Assisted Design of High Temperature-Resistant Polyacrylamide/Poloxamer Interpenetrating Network Hydrogels
Source: MDPI journal article supplement (doi:10.3390/molecules27165326), 2022-08-21
Supplement: s1 [file s1]

# Supporting Information

## Molecular Dynamics-assisted Design of High Temperature-Resistant Polyacrylamide/Ploxamer Interpenetrating Network Hydrogels

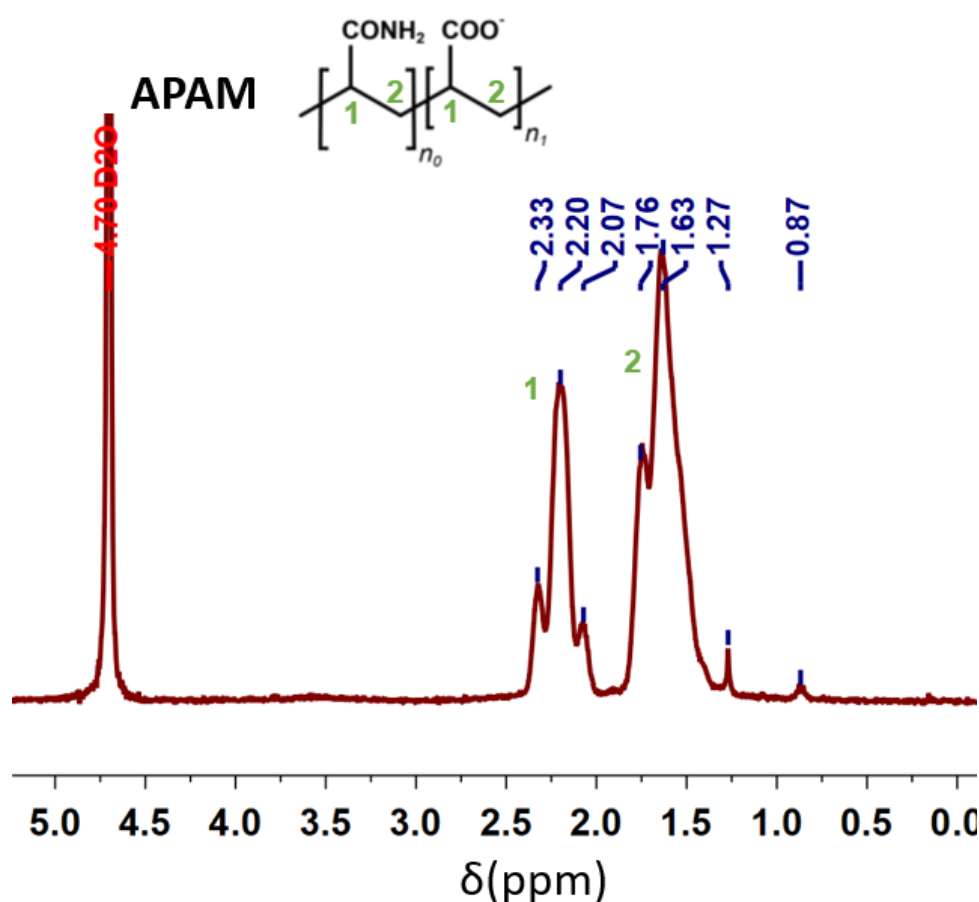

**Figure. S1** The full  $^1\text{H}$  NMR spectrum of the APAM. The peak for hydrogens on methylene groups ( $-\text{CH}_2-$ ) attached to carboxyl or amide groups is observed around  $\delta$  2.20. The hydrogen of  $-\text{CH}_2-$  on the polymer chain appears around  $\delta$  1.63.

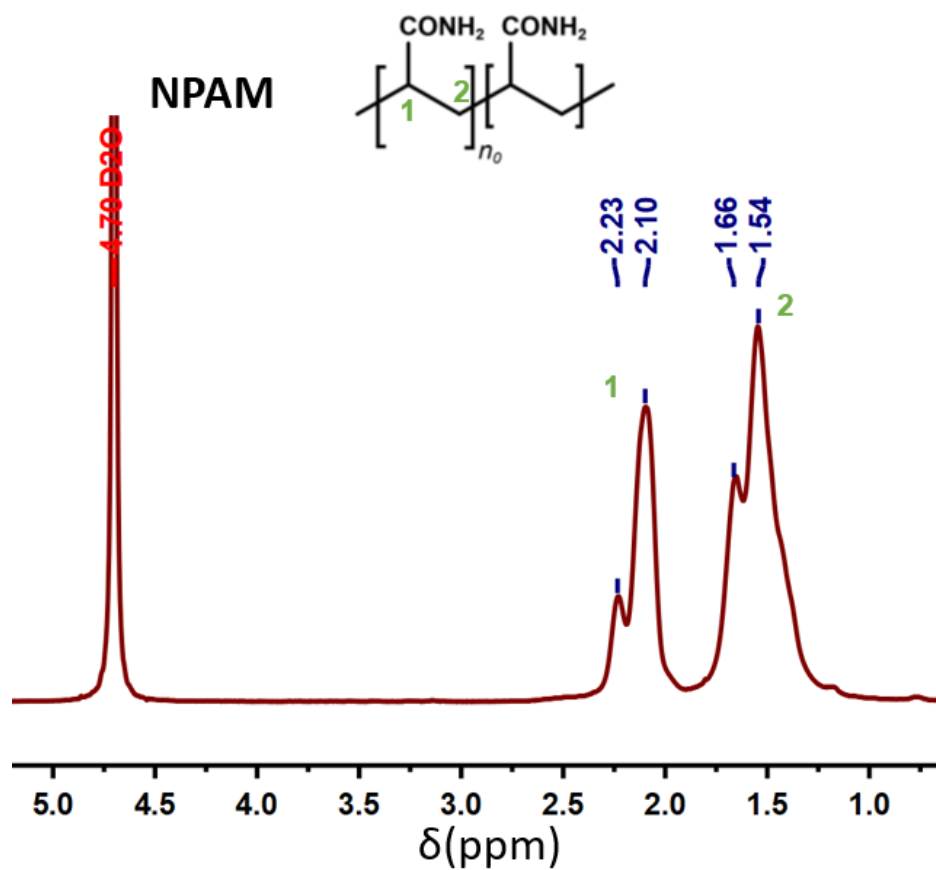

**Figure. S2** The full  $^1\text{H}$  NMR spectrum of the **NPAM**. The peak of the hydrogen on the methylene ( $-\text{CH}-$ ) attached to the carboxyl or amide group is around  $\delta$  2.10. The hydrogen of  $-\text{CH}_2$  on the polymer chain appears around  $\delta$  1.66.

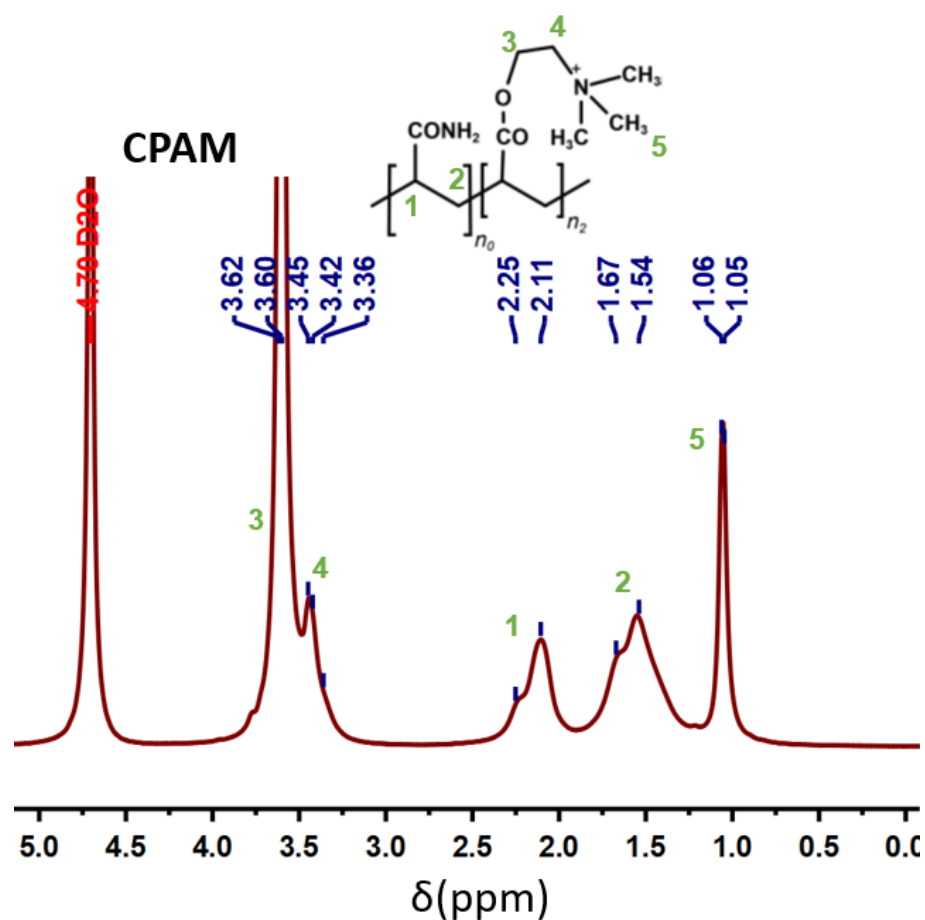

**Figure. S3** The full  $^1\text{H}$  NMR spectrum of the CPAM. The peak for hydrogens on methylene groups (-CH-) attached to carboxyl or amide groups is observed around  $\delta$  2.11. The hydrogen of -CH<sub>2</sub> on the polymer chain appears around  $\delta$  1.54. In addition, the hydrogens of methyl groups (-CH<sub>3</sub>) located on branched chains are observed around  $\delta$  1.05. The hydrogens on the methylene groups on the branch are located at  $\delta$  3.30 and  $\delta$  3.60, respectively.

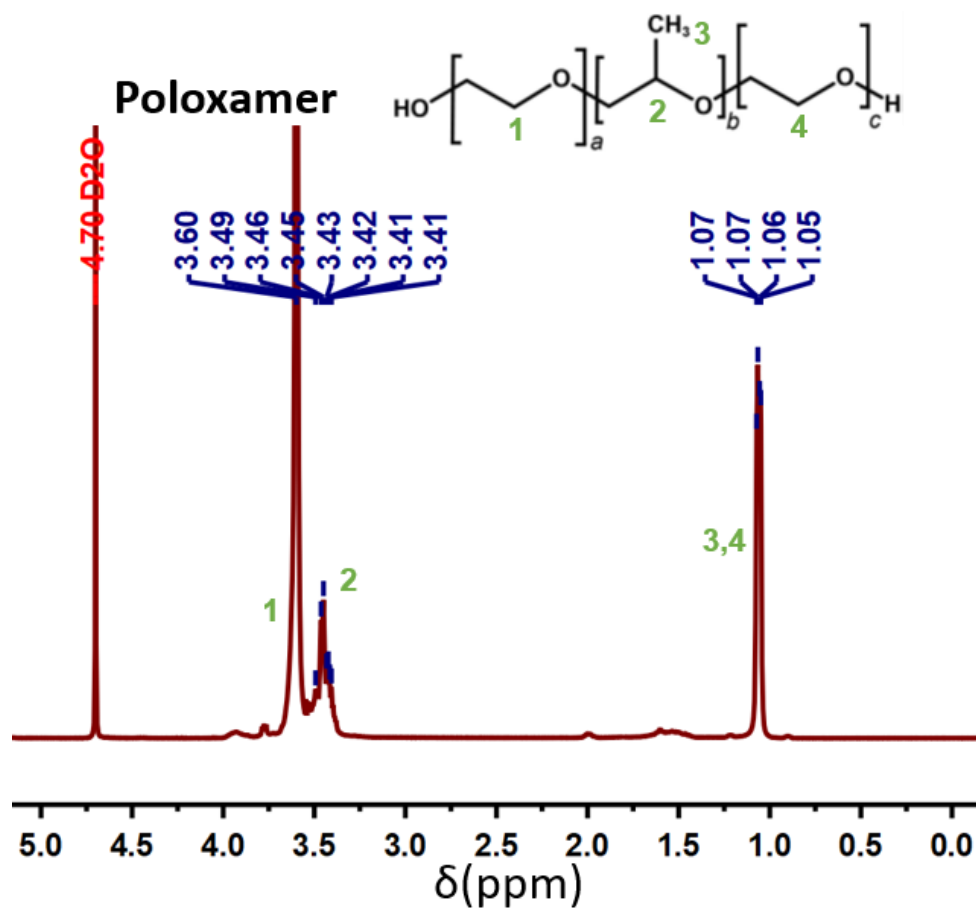

**Figure. S4** The full  $^1\text{H}$  NMR spectrum of the poloxamer. The hydrogen of the methyl group ( $-\text{CH}_3$ ) on the molecular chain is located at  $\delta$  2.20. In addition, the hydrogen peak on the methylene group ( $-\text{CH}-$ ) attached to the methyl group is around  $\delta$  3.41. The peak appearing around  $\delta$  3.60 is the hydrogen on the methylene ( $-\text{O}-\text{CH}-$ ) attached to the ether group.

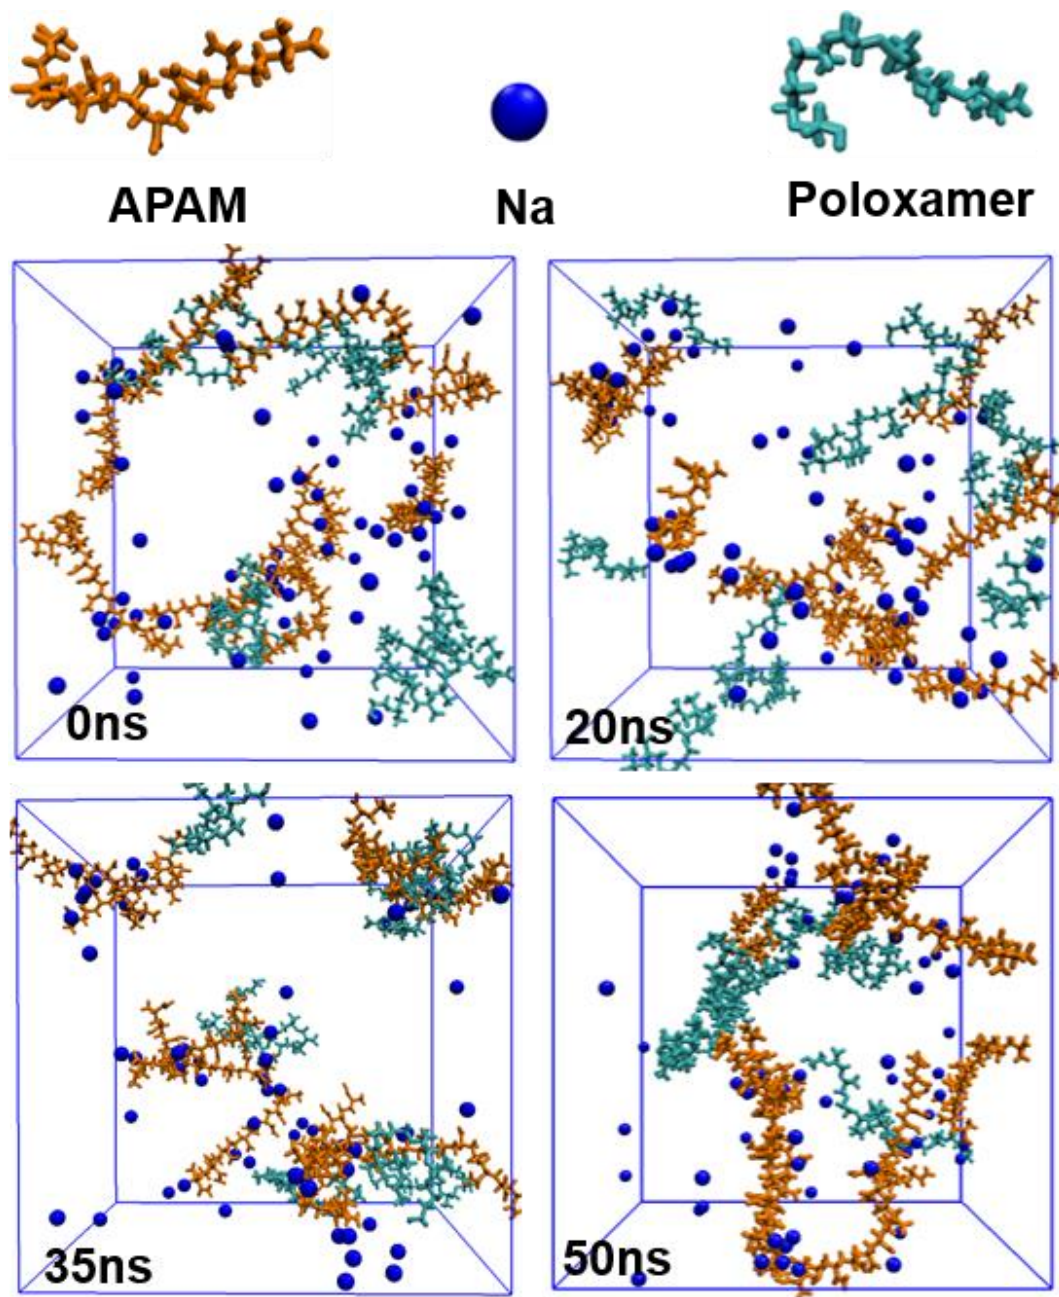

**Figure. S5** Molecular dynamics process of the interaction between **APAM** and poloxamer.

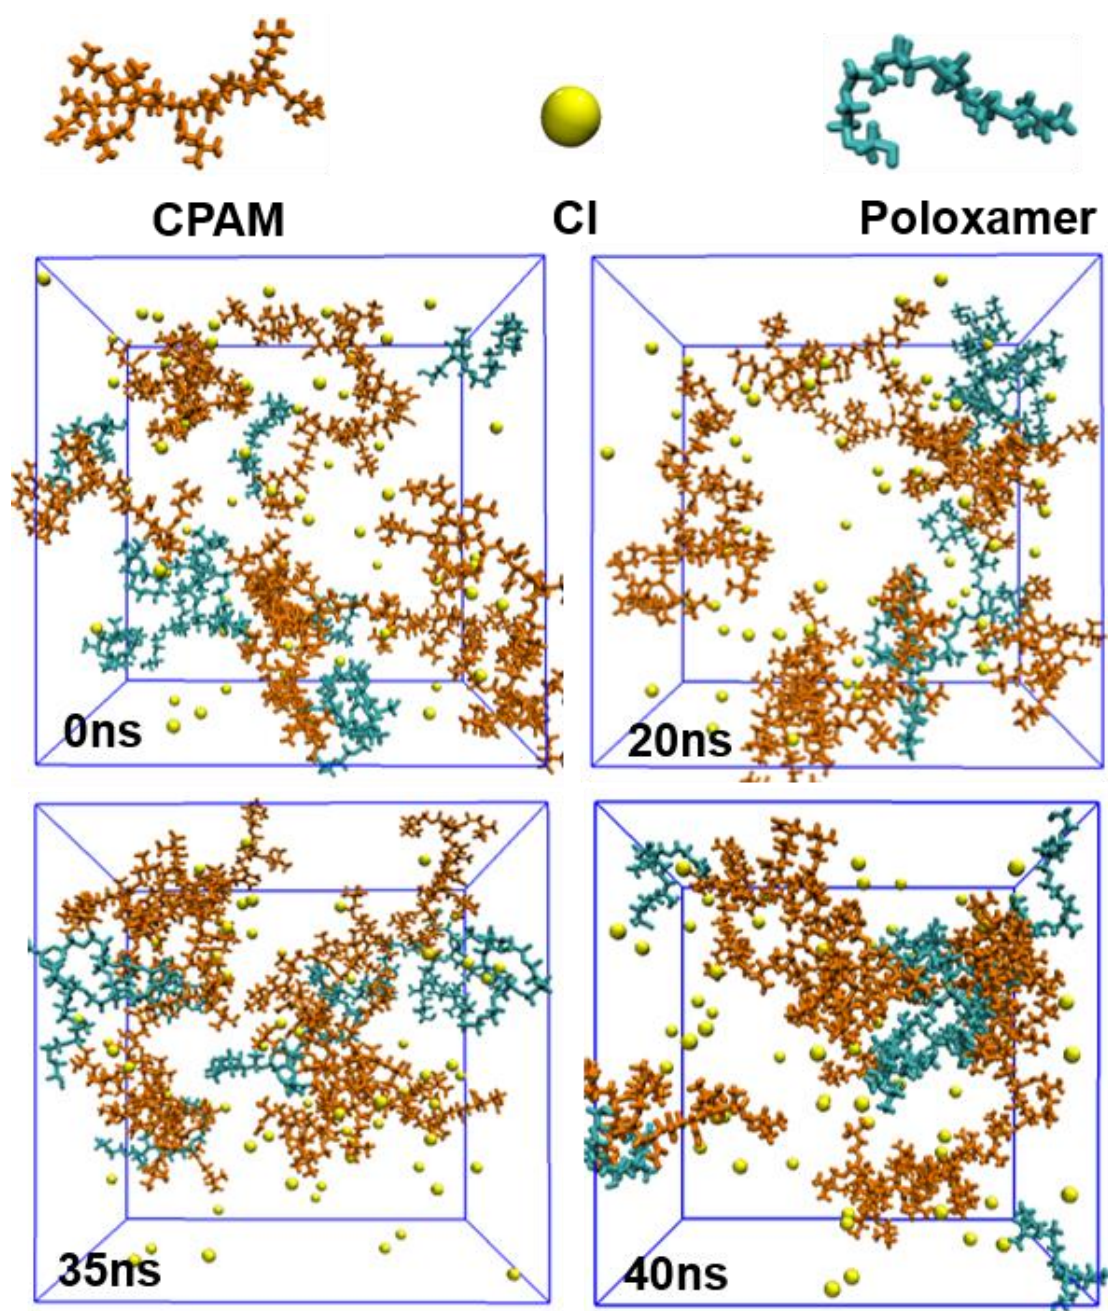

**Figure. S6** Molecular dynamics process of the interaction between **CPAM** and poloxamer.

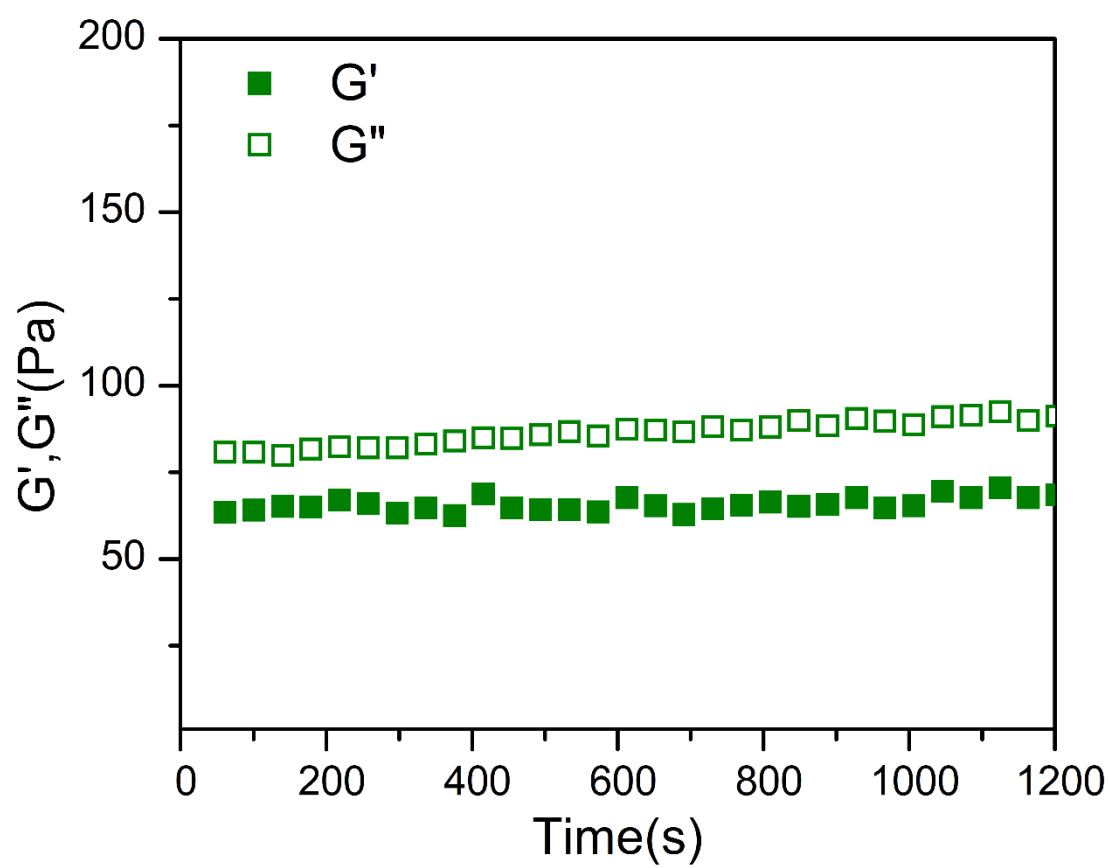

**Figure. S7**  $G'$  and  $G''$  values of CPAM/poloxamer composite system.

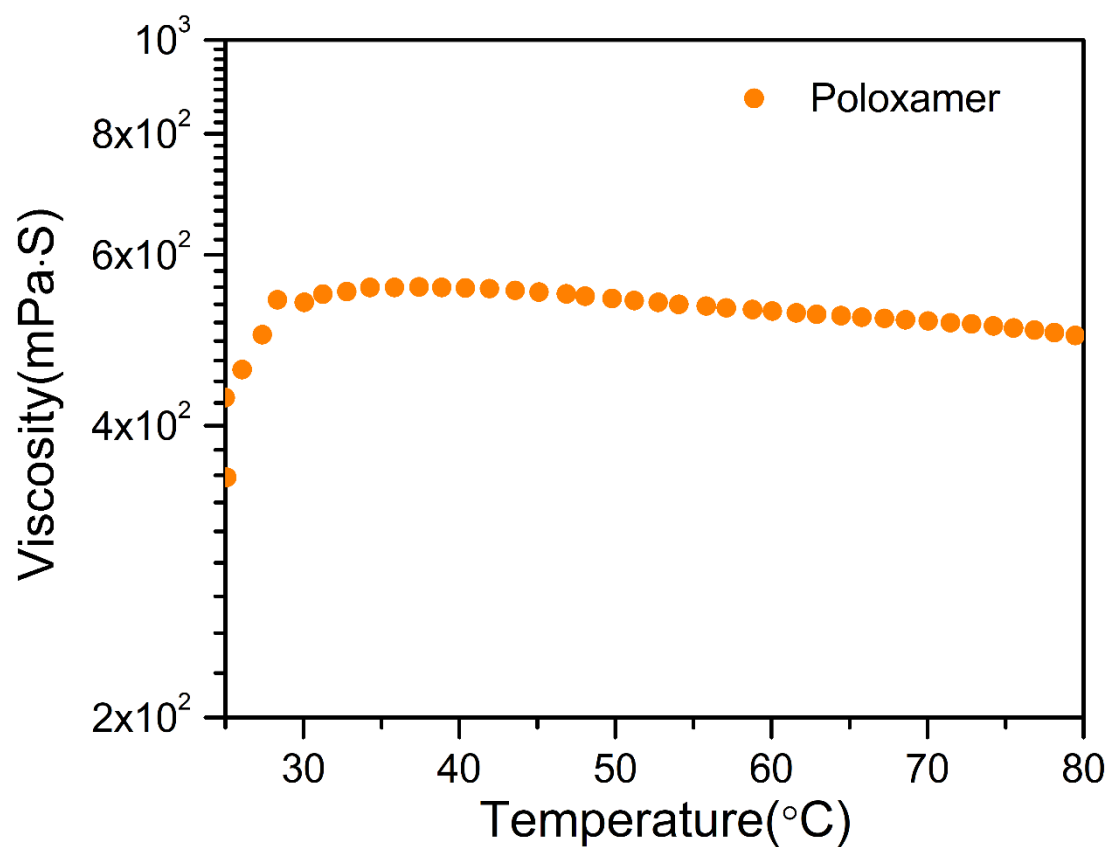

**Figure. S8** Viscosity of poloxamer (mass fraction: 10 wt%) in the temperature range of 25-80°C.



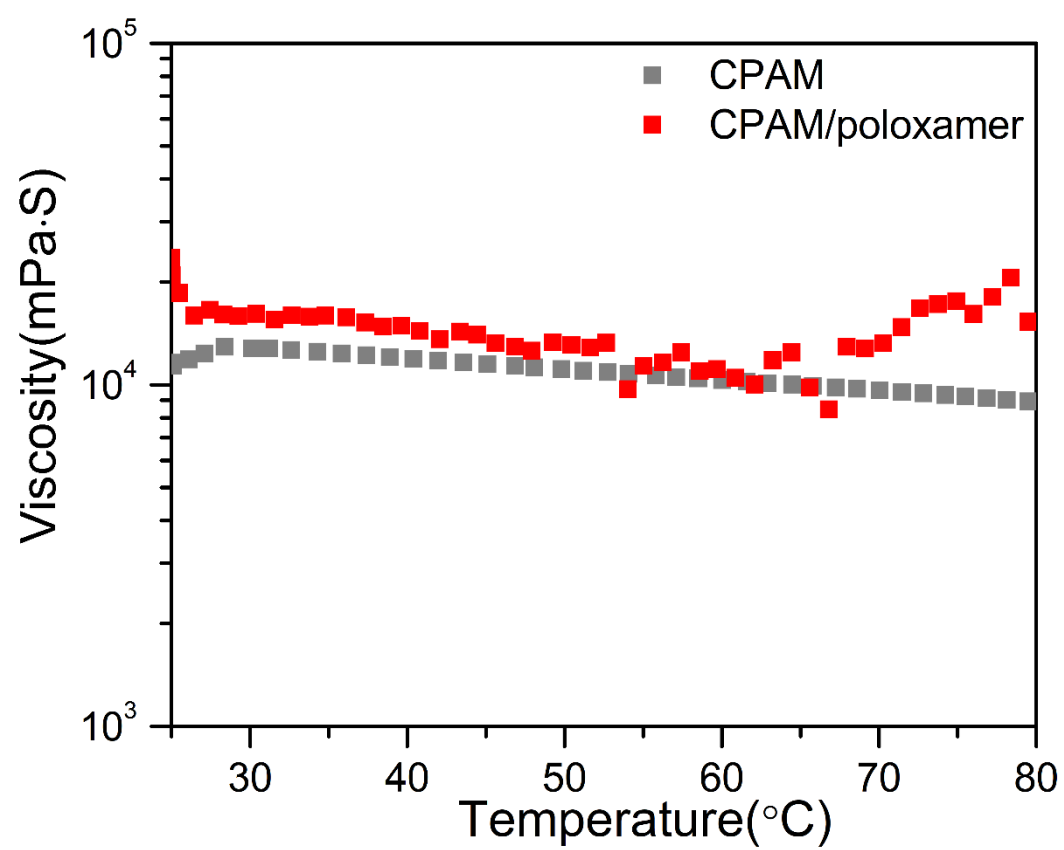

**Figure. S9** Viscosity of CPAM and CPAM/poloxamer.

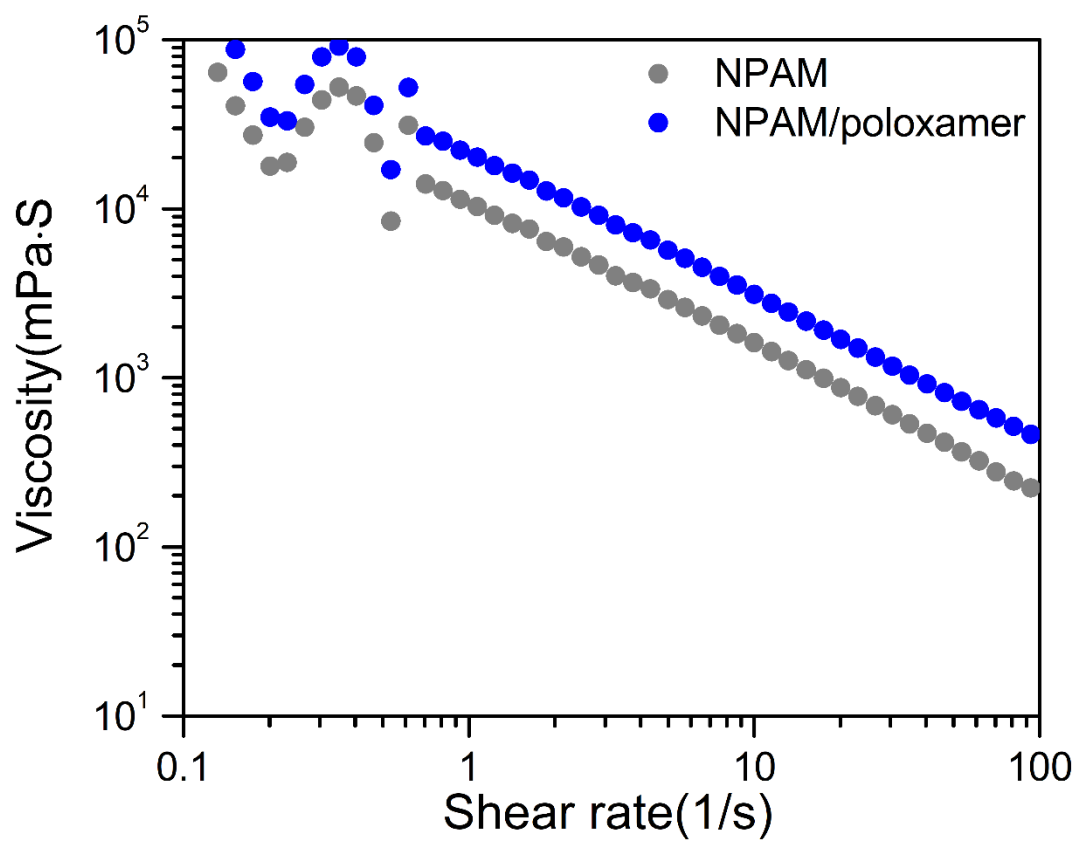

**Figure. S10** Viscosity of NPAM and NPAM/poloxamer.

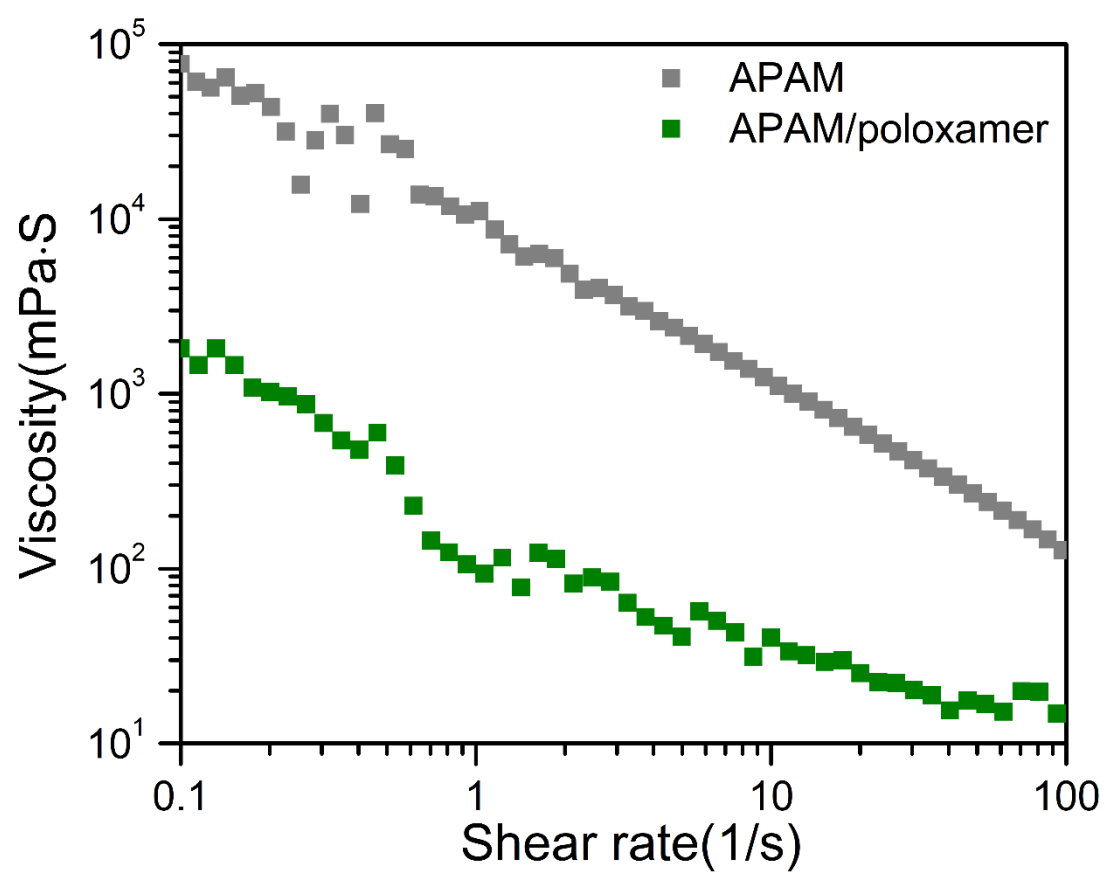

**Figure. S11** Viscosity of APAM and APAM/poloxamer.

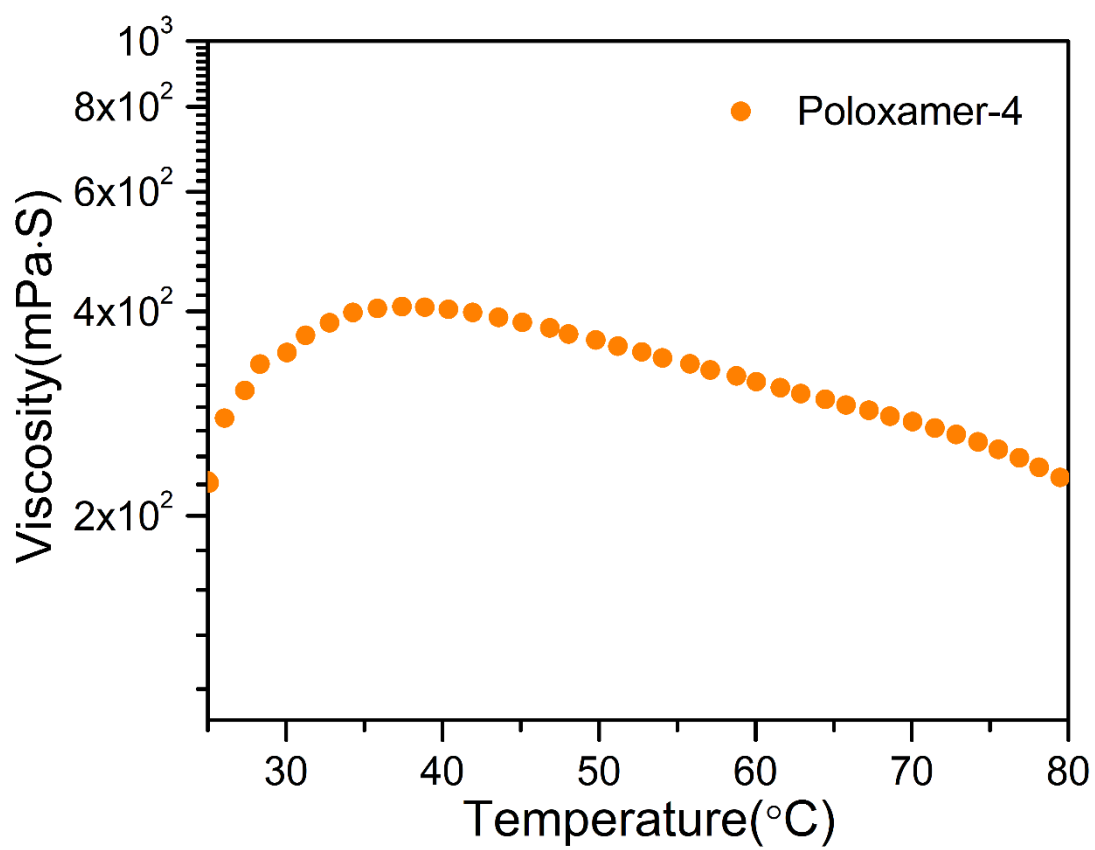

**Figure. S12** Viscosity of poloxamer (mass fraction: 4 wt%) in the temperature range of 25-80°C.
